1 **Title page**

2 Autophagy Decreases Alveolar Epithelial Cell Injury by Suppressing the NF- $\kappa$ B  
3 Signaling Pathway and Regulating the Release of Inflammatory Mediators

4

5 Tao Fan<sup>1</sup>, Shuo Yang<sup>2</sup>, Zhixin Huang<sup>3</sup>, Wei Wang<sup>1</sup>, Shize Pan<sup>1</sup>, Yao Xu<sup>1</sup>, Boyou

6 Zhang<sup>4</sup>, Zhangfan Mao<sup>1</sup>, Yifan Fang<sup>1</sup>, Xiaobo Guo<sup>1</sup>, Hao Hu<sup>1</sup>, Qing Geng<sup>1\*</sup>

7

8 <sup>1</sup>Department of Thoracic Surgery, Renmin Hospital, Wuhan University, 238<sup>th</sup> Jiefang  
9 Road, Wuhan 430060, China

10 <sup>2</sup>Department of Cardiology, Renmin Hospital, Wuhan University, Cardiovascular  
11 Research Institute of Wuhan University, 238<sup>th</sup> Jiefang Road, Wuhan, 430060, China

12 <sup>3</sup>Department of Gynecology and Obstetrics, Renmin Hospital, Wuhan University,  
13 238<sup>th</sup> Jiefang Road, Wuhan 430060, China

14 <sup>4</sup>Department of Emergency, Beijing Ji Shui Tan Hospital, 31 Xijiekou East Street,  
15 Xicheng District, Beijing, 100035, China

16

17 \*Corresponding author: Department of Thoracic Surgery, Renmin Hospital, Wuhan  
18 University, Wuhan 430060, China; [Tel: +027-88041911-82240](tel:+027-88041911-82240); fax:  
19 027-88042292; e-mail:[szgqing@126.com](mailto:szgqing@126.com) (Q.G.)

20

21 Word count text: 2,403

22 Word count methods: 1,306

23

## 24 **Abstract**

25       To research the impact of autophagy on alveolar epithelial cell inflammation and  
26 its possible mechanism in early stages of hypoxia, we established a cell  
27 hypoxia-reoxygenation model and orthotopic left lung ischemia-reperfusion model.  
28 Rat alveolar epithelial cells stably expressing GFP-LC3 were treated with an  
29 autophagy inhibitor (3-methyladenine, 3-MA) or autophagy promoter (rapamycin),  
30 followed by hypoxia-reoxygenation treatment at 2, 4 and 6h in vitro. In vivo,  
31 twenty-four male Sprague-Dawley rats were randomly divided into four groups  
32 (model group: no blocking of hilum in the left lung; control group: blocking of hilum  
33 in the left lung for 1h with DMSO lavage; 3-MA group: blocking of hilum in the left  
34 lung for 1h with 100ml/kg of 3-MA (5 $\mu$ mol/L) solution lavage; rapamycin group:  
35 blocking of hilum in the left lung for 1h with 100ml/kg of rapamycin (250nmol/L)  
36 solution lavage) to establish an orthotopic left lung ischemia model. This study  
37 demonstrated that rapamycin significantly suppressed the NF- $\kappa$ B signaling pathway,  
38 restrained the expression of pro-inflammatory factors. A contrary result was  
39 confirmed by 3-MA pretreatment. These findings indicate that autophagy reduces  
40 ischemia-reperfusion injury by repressing inflammatory signaling pathways in the  
41 early stage of hypoxia in vitro and in vivo. This could be a new protective method for  
42 lung ischemia-reperfusion injury.

## 43 **Key words**

44 Inflammation; Autophagy; Hypoxia-reoxygenation; Ischaemia-reperfusion; Alveolar  
45 epithelial cell

## 47 **Introduction**

48 Ischemia–reperfusion (I/R) inflammatory injury, which is characterized by free  
49 radical reaction, intracellular calcium overload and leukocyte activation, is a major  
50 predisposing factor for lung failure and sudden death in lung transplant operations.  
51 However, although intensive investigations of I/R injury in recent decades have  
52 promoted the identification of a series of cellular pathologies and improved the  
53 operation and survival rate of lung transplantation, many of the mechanisms have not  
54 been clarified. Therefore, a better understanding of the pathogenesis of I/R  
55 inflammatory injury and the identification of novel therapeutic methods are greatly  
56 needed.

57 I/R injury during lung transplantation involves the induction of genes associated  
58 with a number of cellular functions, including apoptosis, inflammation, and oxidative  
59 stress(1-3). After pretreatment with I/R, alveolar epithelial cells release inflammatory  
60 mediators such as reactive oxygen species (ROS), nitric oxide (NO), tumor necrosis  
61 factor  $\alpha$  (TNF- $\alpha$ ), interleukin-1 $\beta$  (IL-1 $\beta$ ) and interleukin-10 (IL-10)(4-9). Nuclear  
62 factor kappa B (NF- $\kappa$ B) is a transcription factor that is widely known to be associated  
63 with inflammatory responses following ischemia(10, 11). In the early stage of I/R, the  
64 activation of I $\kappa$ B kinase beta (IKK $\beta$ ), the most important kinase upstream of NF- $\kappa$ B,  
65 results in the phosphorylation and proteolysis of I $\kappa$ B $\alpha$ , which promote the expression  
66 of pro-inflammatory cytokines such as TNF- $\alpha$  and IL-1 $\beta$ (12). The positive feedback  
67 cascade in I/R leads to an excessive inflammatory response in the lung, which is the  
68 main cause of early complications in patients after lung transplantation. Therefore,

69 blocking the NF- $\kappa$ B signaling pathway is an effective strategy for reducing  
70 inflammatory injury during lung I/R(13, 14).

71 TNF- $\alpha$ , IL-1 $\beta$ , ICAM-1 and MCP-1 are downstream effects of the NF- $\kappa$ B  
72 signaling pathway, which are pro-inflammatory cytokines and can be measured to  
73 assess NF- $\kappa$ B activity(14-16). IL-10 is an anti-inflammatory cytokine that has a  
74 crucial role in preventing inflammatory and immune response(17, 18). In the present  
75 study, these inflammatory mediators were detected to verify inflammation activity.

76 Autophagy is an intracellular self-digesting pathway that delivers cytoplasmic  
77 constituents into the lysosome(19). Autophagy controls the turnover of proteins and  
78 organelles within cells to help in survival and longevity of cells in metabolic stress(20,  
79 21). Early research indicated that autophagy could be induced by different conditions,  
80 including nutrient deprivation/starvation, oxidative stress, hypoxia, and  
81 chemotherapeutic drugs(3, 22-24). Autophagy also plays an important role in innate  
82 and adaptive immunity and can be regulated by different cytokines, such as TGF- $\beta$  or  
83 IL-6(25-28).

84 Autophagy, inflammatory cytokines and NF- $\kappa$ B signaling pathways are all  
85 involved in lung I/R inflammatory injury, but few researchers have determined its  
86 regulatory mechanism. The purpose of this study is to research the impact of  
87 autophagy on alveolar epithelial cell inflammatory injury in the early stage of hypoxia  
88 in vitro and in vivo and characterize its mechanism. Using an autophagy inhibitor  
89 (3-methyladenine, 3-MA) and autophagy promoter (rapamycin) to regulate autophagy  
90 levels, we demonstrate that exogenously enhancing autophagy significantly decreases

91 alveolar epithelial cell inflammatory injury by blocking the NF- $\kappa$ B signaling pathway,  
92 attenuating pro-inflammatory cytokine expression and increasing anti-inflammatory  
93 cytokine expression. These new findings could be a new protective method in lung  
94 ischemia-reperfusion inflammatory injury.

## 95 **Results**

### 96 **Effect of 3-MA and rapamycin on GFP-LC3/CCL149 cell viability**

97 The effect of different concentrations of autophagy inhibitor 3-MA and  
98 autophagy promoter rapamycin on GFP-LC3/CCL149 cell viability was detected by  
99 MTT assay. As shown in **Fig. 1C**, the cell inhibition rates were 14.3, 18.2 and 48.7%  
100 for 3-MA at 5, 10 and 15 $\mu$ mol/L, respectively. The cell inhibition rates were 2.3, 2.5  
101 and 2.4% for rapamycin at 150, 200 and 250nmol/L, respectively. Therefore, 5 $\mu$ mol/L  
102 3-MA and 250nmol/L rapamycin were chosen for further experiments.

### 103 **Fluorescence microscopy observation**

104 The effect of 3-MA and rapamycin on autophagy formation in  
105 GFP-LC3/CCL149 cells was evaluated by observing autophagosomes under  
106 fluorescence microscopy following H/R treatment for 2, 4 and 6h (**Fig. 1A**). Green  
107 fluorescence indicated that GFP-LC3/CCL149 cells were successfully constructed.  
108 The cellular surface areas of GFP(+) cells were measured by immune staining after  
109 pretreating with DMSO, 3-MA (5 $\mu$ mol/L) and rapamycin (250nmol/L) followed by  
110 H/R treatment for 0, 2, 4 and 6h (**Fig. 1B**). Quantitative results of the green cell  
111 surface area of GFP (+) cells indicated that 3-MA decreased the expression of  
112 autophagy marker protein LC3. In contrast, rapamycin promoted the expression of

113 autophagy marker protein LC3.

#### 114 **Autophagy is inhibited by 3-MA and strengthened by rapamycin**

115 To research the impact of 3-MA and rapamycin on autophagy, we observed the  
116 formation of autophagosomes under transmission electron microscope in  
117 GFP-LC3/CCL149 cells after pretreatment with DMSO, 3-MA (5 $\mu$ mol/L) and  
118 rapamycin (250nmol/L) followed by H/R treatment for 0, 2, 4 and 6h. As shown in  
119 **Fig. 2**, autophagy activity was obviously enhanced in cells pretreated with rapamycin.

120 Autophagosomes are indicated by arrows. We further measured the expression of  
121 autophagy-related gene LC3-II/I and Beclin1 in indicated groups. Western blotting  
122 results showed the protein levels of LC3-II/I and Beclin1 in GFP-LC3/CCL149 cells  
123 **(Fig. 3A)**. The protein levels of LC3-II/I and Beclin1 were quantified and analyzed in  
124 the indicated groups**(Fig. 3B, C)**.The protein levels of GFP-LC3 and Beclin1 in the  
125 3-MA group were significantly lower than in the control group, and those in the  
126 rapamycin group were significantly higher than in the control group.

127 To further verified the effect of 3-MA and rapamycin on autophagy, we used  
128 flow cytometry assay to assess LC3-II in GFP-LC3/CCL149 cells after pretreatment  
129 with DMSO, 3-MA (5 $\mu$ mol/L) and rapamycin (250nmol/L) followed by H/R  
130 treatment for 0, 2, 4 and 6h. As shown in **Fig. 3D**, the trend of the results was  
131 consistent with that of western blot assay and transmission electron microscope assay.  
132 The percentage of cells with endogenous LC3 in the rapamycin pretreated group was  
133 significantly increased compared to that of the DMSO group and 3-MA group.

134 **NF- $\kappa$ B was repressed by an autophagy promoter and enhanced by an autophagy**

135 **inhibitor at an early stage of GFP-LC3/CCL149 cell H/R**

136 To research the impact of autophagy on inflammation at early stages of H/R, we  
137 measured the NF- $\kappa$ B signaling pathway by immunohistochemistry in  
138 GFP-LC3/CCL149 cells after pretreatment with DMSO, 3-MA (5 $\mu$ mol/L) and  
139 rapamycin (250nmol/L) followed by H/R treatment for 0, 2, 4 and 6h (**Fig. 4A**).  
140 Immunohistochemical analysis revealed that NF- $\kappa$ B integrated optical density in  
141 3-MA group was significantly higher than in the control group and in the rapamycin  
142 group was significantly lower than in the control group (**Fig. 4C**). We further  
143 measured the protein expression of NF- $\kappa$ B in the indicated groups (**Fig. 4B**). The  
144 protein levels of NF- $\kappa$ B were quantified and analyzed (**Fig. 4D**). The results  
145 suggested that strengthening autophagy suppressed NF- $\kappa$ B protein expression, which  
146 indicated that exogenously enhancing autophagy reduced inflammation injury by  
147 suppressing the NF- $\kappa$ B signaling pathway in alveolar epithelial cell  
148 hypoxia-reoxygenation.

149 **I $\kappa$ B was enhanced by an autophagy promoter and repressed by an autophagy**  
150 **inhibitor at an early stage of GFP-LC3/CCL149 cell H/R**

151 To further verify the impact of autophagy on the NF- $\kappa$ B signaling pathway at an  
152 early stage of H/R, we further detected the I $\kappa$ B expression. We measured I $\kappa$ B by  
153 immunohistochemistry in GFP-LC3/CCL149 cells after pretreatment with DMSO,  
154 3-MA (5 $\mu$ mol/L) and rapamycin (250nmol/L) followed by H/R treatment for 0, 2, 4  
155 and 6h (**Fig. 5A**). I $\kappa$ B integrated optical density in the 3-MA group was significantly  
156 lower than in the control group and that in the rapamycin group was significantly

157 higher than in the control group (**Fig. 5C**). We further measured the protein  
158 expression of I $\kappa$ B in the indicated groups (**Fig. 5B**). The protein levels of I $\kappa$ B were  
159 quantified and analyzed (**Fig. 5D**). The results suggested that strengthening autophagy  
160 increased I $\kappa$ B protein expression, which indicated that exogenously enhancing  
161 autophagy reduced inflammation injury by increasing I $\kappa$ B expression in alveolar  
162 epithelial cell hypoxia-reoxygenation.

163 **Effect of autophagy on inflammatory factors at an early stage of**  
164 **GFP-LC3/CCL149 cell H/R**

165 In addition to the NF- $\kappa$ B signaling pathway, we also examined the influence of  
166 autophagy on downstream effects of the NF- $\kappa$ B signaling pathway in  
167 GFP-LC3/CCL149 cells after pretreatment with DMSO, 3-MA (5 $\mu$ mol/L) and  
168 rapamycin (250nmol/L) followed by H/R treatment for 0, 2, 4 and 6h. After  
169 determining the concentration of each cellular factor using a spectrophotometer (**Fig.**  
170 **6A, C, E, G, I**), we measured pro-inflammatory factors TNF- $\alpha$  and IL-1 $\beta$ , MCP-1,  
171 ICAM-1 and anti-inflammatory cytokine IL-10 by ELISA kits (**Fig. 6B, D, F, H, J**).  
172 The result indicated that enhancing autophagy restrained pro-inflammatory factor  
173 expression and increased anti-inflammatory cytokine expression.

174 **Autophagy activity was inhibited by 3-MA and strengthened by rapamycin in**  
175 **alveolar epithelial cells in rat lung I/R**

176 To further illuminate whether autophagy activity is regulated by 3-MA and  
177 rapamycin in alveolar epithelial cells in rat lung I/R, we lavaged rat lungs with DMSO,  
178 3-MA or rapamycin during lung ischemia for 1h and then reperfusion for 2h. The



179 model group was not treated with ischemia. Subsequently, we observed the formation  
180 of autophagosomes under a transmission electron microscope (**Fig. 7A**) and detected  
181 the expression of autophagy-related gene GFP-LC3 and Beclin1 by Western blotting  
182 (**Fig. 7B**). The protein levels of GFP-LC3 and Beclin1 were quantified and analyzed  
183 in the indicated groups (**Fig. 7C, D**). The protein levels of GFP-LC3 and Beclin1 in the  
184 3-MA group were significantly lower than in the control group, and those in the  
185 rapamycin group were significantly higher than in the control group.

### 186 **The NF- $\kappa$ B signaling pathway was restrained by autophagy in alveolar epithelial** 187 **cell in rat lung I/R**

188 To gain insight into the effect of autophagy on the NF- $\kappa$ B signaling pathway in  
189 rat lung I/R, we lavaged rat lungs with autophagy promotor (rapamycin) or inhibitor  
190 (3-MA) during lung ischemia for 1h and then reperfused for 2h. The model group was  
191 not treated with ischemia. NF- $\kappa$ B and I $\kappa$ B were measured by immunohistochemistry  
192 (**Fig. 8A**). Immunohistochemical analysis revealed that strengthening autophagy  
193 suppressed NF- $\kappa$ B protein expression and increased I $\kappa$ B protein expression (**Fig. 8B**).  
194 Western blotting results showed the protein levels of NF- $\kappa$ B and I $\kappa$ B in lung tissues  
195 from Lewis rats after pretreatment with I/R (**Fig. 8C**). The protein levels of NF- $\kappa$ B  
196 and I $\kappa$ B were quantified and analyzed in the indicated groups (**Fig. 8D, E**). These  
197 results further revealed that exogenously enhancing autophagy reduced inflammation  
198 injury by suppressing the NF- $\kappa$ B signaling pathway in alveolar epithelial cells in rat  
199 lung I/R.

### 200 **Effect of autophagy on inflammatory factors in alveolar epithelial cells in rat**

## 201 **lung I/R**

202 To obtain further knowledge regarding the mechanisms of autophagy reducing  
203 alveolar epithelial cell inflammation injury in oxygen deficiency, we detected  
204 inflammatory factors in rat lung I/R, which were lavaged with DMSO, 3-MA or  
205 rapamycin during lung ischemia for 1h and then reperfusion for 2h. The  
206 pro-inflammatory factors TNF- $\alpha$  and IL-1 $\beta$ , MCP-1 and ICAM-1 in the 3-MA group  
207 were significantly higher than in the control group, and those in the rapamycin group  
208 were significantly lower than in the control group (**Fig. 9A, C, D**). In contrast,  
209 anti-inflammatory factor IL-10 showed an increasing trend with enhanced autophagy  
210 levels (**Fig. 9B**). The result indicated that enhancing autophagy can lessen  
211 inflammatory injury by restraining the expression of pro-inflammatory factors and  
212 increasing anti-inflammatory cytokine expression.

## 213 **Discussion**

214 Lung ischemia reperfusion (I/R) is a frequent event in clinic processes, inducing  
215 distant organ dysfunction, especially lung transplantation or acute pulmonary tissue  
216 injury. The release of pro-inflammatory cytokines during I/R is one of the most  
217 important factors that lead to lung failure(29). Our team has proved that exogenously  
218 enhancing autophagy decreased alveolar macrophages apoptosis by attenuating  
219 endoplasmic reticulum stress and oxidative stress in hypoxia-reoxygenation or  
220 ischemia-reperfusion injury(30). In this study, we established a cell model of alveolar  
221 epithelial cell hypoxia-reoxygenation (H/R) and a rat model of focal lung I/R. For the  
222 first time, the present study reveals that rapamycin decreases alveolar epithelial cell

223 inflammatory injury by blocking the NF- $\kappa$ B signaling pathway, attenuating the  
224 expression of pro-inflammatory cytokines TNF- $\alpha$ , IL-1 $\beta$ , ICAM-1 and MCP-1 and  
225 increasing the expression of anti-inflammatory cytokine IL-10. Based on various in  
226 vivo and in vitro tissue ischemia and cell hypoxia models, we clearly identified that  
227 exogenously enhancing autophagy as a positive regulator of alveolar epithelial cells  
228 and lungs responding to oxygen deficiency via blockade of the NF- $\kappa$ B signaling  
229 pathway attenuate pro-inflammatory cytokine expression and increase  
230 anti-inflammatory cytokine expression.

231 It has been confirmed that inflammation is an important component of lung I/R.  
232 Previous studies demonstrated that inflammatory cytokine infiltration into the lungs  
233 during I/R injury participates in the pathogenesis of acute lung failure, especially in  
234 patients after lung transplantation. Previous studies have demonstrated that the NF- $\kappa$ B  
235 pathway involved in lung disease is induced by I/R(13, 15, 16). NF- $\kappa$ B is combined  
236 with the inhibitory unit inhibitory  $\kappa$ B (I $\kappa$ B) and is located in the cytoplasm. When I $\kappa$ B  
237 is phosphorylated by its kinase I $\kappa$ B kinase (IKK), NF- $\kappa$ B could trigger multiple  
238 downstream effects including activation of pro-inflammatory cytokines (TNF- $\alpha$  and  
239 IL-1 $\beta$ ), ICAM-1 and MCP-1 accumulation, and the infiltration of immune cells in  
240 ischemic tissues(31-35). It is also reported that IL-10 can block transepithelial  
241 migration of neutrophils(36, 37), which is tightly related to inflammatory and  
242 autoimmune pathologies(17). Therefore, inhibiting the inflammatory response is an  
243 effective therapeutic method to improve lung I/R injury.

244 To the best of our knowledge, the present study is the first to show that

245 exogenously enhancing autophagy markedly stimulates the expression of  
246 anti-inflammatory cytokine IL-10 at an early stage of hypoxia in vitro and in vivo.  
247 Furthermore, the NF- $\kappa$ B signaling pathway and its downstream effects on expression  
248 were significantly inhibited by rapamycin under conditions of oxygen deficit. The  
249 current results suggested that an autophagy promoter could be a new protective  
250 method in lung inflammatory injury induced by ischemia-reperfusion.

## 251 **Materials and Methods**

### 252 **Cell culture**

253 For the in vitro studies, the alveolar epithelial cell line CCL149 (ATCC,  
254 Manassas, VA, USA, #CCL149) was chosen as the cell model. The cells were  
255 maintained in F-12K medium (ATCC, Manassas, VA, USA) supplemented with 20%  
256 fetal bovine serum (FBS, Invitrogen, Carlsbad, CA, USA) at 37°C in a humidified  
257 5% CO<sub>2</sub> atmosphere. Additionally, 10% heat-inactivated fetal calf serum was  
258 contained in the medium. When the cells reached 80% confluence, they were digested  
259 with 0.25% trypsin.

### 260 **Constructing a stable GFP-LC3/CCL149 cell line**

261 Briefly, the GFP-LC3 plasmid (Addgene, Cambridge, MA, USA) was  
262 transfected into CCL149 cells by applying Lipofectamine 2000 reagent (Invitrogen,  
263 Carlsbad, CA, USA). The experiment was conducted in accordance with the  
264 instructions. Twenty-four hours later, the cells were transferred to culture in F-12K  
265 medium containing 300 $\mu$ g/ml of G418 (Invitrogen, Carlsbad, CA, USA). After 2  
266 weeks of expansion, the CCL149 cells were observed under a fluorescence

267 microscope (Olympus, Japan), and the strong green fluorescent colonies were selected  
268 as stable GFP-LC3/CCL149 cells and cultured in medium containing 100 $\mu$ g/ml of  
269 G418 and 10% FBS for further experiments in the study.

#### 270 **MTT assay**

271 The general viability of the cells was measured using an MTT assay(38). The  
272 percentage of cell viability inhibition was calculated as: cell viability = [OD (treated)  
273 –OD (control)]/OD (control)  $\times$  100.

#### 274 **Animal models and procedures**

275 All the animal experimental protocols were approved by the Animal Care and  
276 Use Committee of Renmin Hospital of Wuhan University and were conducted in  
277 accordance with the National Institutes of Health (NIH) Guide for the Care and Use of  
278 Laboratory Animals

279 Male Sprague-Dawley (SD) rats (8weeks old, 250-300g) were fed a standard diet  
280 and maintained in a controlled environment of the animal center. In brief, rats were  
281 anesthetized by an intraperitoneal injection of 10% chloral hydrate (300mg/kg body  
282 weight) and placed in a supine position. The animals were then intubated for artificial  
283 ventilation with oxygen using a small animal breathing machine (5 ml tidal volume,  
284 frequency of 70 per min) and electrocardiograph monitoring. Thoracotomy was  
285 performed at the anterior lateral side of the left fourth intercostal. The muscular layer  
286 and pleura were gently dissected to expose the heart and lung. Then, the hilum of the  
287 left lung was dissociated, and an artery clamp was used to pass through the hilum of  
288 the lung from the upper right to the lower left. The whole clamped left hilum was

289 clearly exposed by slightly stirring up the clamp. Twenty-four SD rats were randomly  
290 divided into four groups (5 rats/group) as follows: (1) model group: no blocking of  
291 hilum in the left lung; control group: blocking of hilum in the left lung for 1h with  
292 DMSO lavage and then reperfusion for 2h; 3-MA group: blocking of hilum in the  
293 left lung for 1h with 100ml/kg of 3-MA (5 $\mu$ mol/L) solution lavage and then  
294 reperfusion for 2h; (4) rapamycin group: blocking of hilum in the left lung for 1h with  
295 100ml/kg of rapamycin (250nmol/L) solution lavage and then reperfusion for 2h. Rats  
296 in the four groups were sacrificed after the experiment. The left lung tissue of the rats  
297 was dissected for further analysis.

#### 298 **Immunofluorescence analysis**

299 The cell surface area of GFP-LC3/CCL149 cells was assessed by  
300 immunofluorescent staining. Briefly, after the hypoxia-reoxygenation (H/R) for 0, 2,  
301 4 or 6 h, the cells were subsequently fixed with 4% paraformaldehyde (Sigma, USA,  
302 #158127), permeabilized with 0.1% Triton X-100/BS for 45 min and then stained with  
303  $\beta$ -actin (1:100 dilution), followed by a fluorescent secondary antibody. The surface  
304 areas were measured using Image-Pro Plus6.0 software. Images were captured using a  
305 special fluorescence microscope (Olympus, Japan).

#### 306 **Transmission electron microscope**

307 In vitro, cells were fixed with 2.5% glutaraldehyde at 4°C overnight after the  
308 H/R treatment for 2, 4 or 6h and then fixed with 1% osmic acid. After being  
309 dehydrated with a graded series of ethanol (50, 70, 80, 95, and 100%; each for 15 min)  
310 and acetone (twice; each for 15 min), the cells were embedded in epoxide resin.

311 Ultra-thin sections were generated using an ultra-microtome (LKB-V, Bromma,  
312 Sweden) followed by staining with uranyl acetate and lead citrate. Then, sections  
313 were observed and photographed under a transmission electron microscope (H-600,  
314 Hitachi, Tokyo, Japan).

315 In vivo, paraffin-embedded lungs were cut transversely into 0.1 $\mu$ m sections.  
316 Then, the sections were observed and photographed under a transmission electron  
317 microscope (H-600, Hitachi, Tokyo, Japan).

### 318 **Flow cytometry**

319 GFP-LC3/CCL149 cells were harvested with DMSO, 3-MA or rapamycin, and  
320 washed with PBS containing 0.05% saponin. For intracellular staining of endogenous  
321 LC3, CCL149 cells were harvested with trypsin, rinsed with culture medium and PBS,  
322 and rinsed with PBS containing 0.05% saponin. Cells were then incubated with mouse  
323 anti-LC3 primary antibody (Abcam, Ab290) for 20 minutes, rinsed with PBS,  
324 incubated with goat antimouse secondary antibody conjugated to R-Phycoerythrin  
325 (BosterBiotech, BA1060) for 20 minutes, and rinsed twice with PBS. More than  
326 30,000 events were captured for every analysis. Fluorescence activated cell sorter data  
327 were collected using a fluorescence activated cell sorter Calibur flow cytometer  
328 (Becton Dickinson) with Cell Quest Pro software. This method was previously  
329 published in ref(39).

### 330 **Immunohistochemical analysis**

331 For immunohistochemistry in vitro, GFP-LC3/CCL149 cells growing on glass  
332 cover slips were fixed for 15min with 4% paraformaldehyde. After being incubated

333 with 0.5% Triton X-100/PBS solution for 30 min and washed with PBS three times,  
334 the GFP-LC3/CCL149 cells were blocked with 3% hydrogen peroxide for 15 min and  
335 subsequently incubated overnight at 4 °C with the primary antibodies. Binding was  
336 visualized with the appropriate peroxidase-conjugated secondary antibodies (AR1022,  
337 ZSGB-BIO) for 20-30 min at 37 °C.

338 For immunohistochemistry *in vivo*, paraffin-embedded lungs were cut  
339 transversely into 5µm sections. Following a 5min high-pressure antigen retrieval  
340 process in 0.1mol/L citrate buffer with a pH of 6.0, the lung sections were blocked  
341 with 3% hydrogen peroxide for 15 min and subsequently incubated overnight at 4 °C  
342 with the primary antibodies. Binding was visualized with the appropriate  
343 peroxidase-conjugated secondary antibodies (AR1022, ZSGB-BIO) for 20-30 min at  
344 37 °C.

#### 345 **Western blotting analysis**

346 Total proteins were extracted from GFP-LC3/CCL149 cells and rat lung tissues  
347 in lysis buffer. The protein concentrations were determined using a Pierce  
348 Bicinchoninic Acid Protein Assay kit (Biyuntian, Shanghai, China, #P0010). Fifty  
349 micrograms of protein was subjected to SDS–polyacrylamide gel electrophoresis  
350 (12%PAGE; Amresco) and transferred to a polyvinylidene fluoride membrane  
351 (Millipore) followed by incubation overnight at 4 °C with the following primary  
352 antibodies: LC3 (Abcam, Cambridge, United Kingdom, #ab62341; 1:200 dilution),  
353 Beclin-1 (Santa Cruz, CA, USA, #sc-11427; 1:200 dilution), NF-κB (Bioworld, CA,  
354 USA, #BS1257; 1:600 dilution), and IκB-α (Bioworld, CA, USA, #BS3601; 1:600



355 dilution). After incubation with peroxidase-conjugated secondary antibodies (BA1060,  
356 at 1:50,000 dilution), the bands were visualized using Bio-Rad Chemi Doc™ XRS+  
357 (Bio-Rad). Protein expression levels were normalized to the corresponding  $\beta$ -actin  
358 levels.

### 359 **ELISA measurements of cytokines in rat lung tissues and GFP-LC3/CCL149** 360 **cells**

361 Rat lung tissues were washed and then homogenized on ice with normal saline.  
362 Homogenates from rat lung tissues or GFP-LC3/CCL149 cell culture supernatants  
363 were centrifuged at 12000rpm for 10min at 4 C, and the supernatants (100 $\mu$ L) were  
364 used for analysis. The levels of tumor necrosis factor- $\alpha$  (TNF- $\alpha$ ), interleukin-1 $\beta$   
365 (IL-1 $\beta$ ), interleukin-10 (IL-6), macrophage chemoattractant protein-1 (MCP-1) and  
366 intercellular adhesion molecule-1 (ICAM-1) were measured by enzyme-linked  
367 immunosorbent assay (ELISA) kits (Elabscience, USA) in triplicate according to the  
368 manufacturer's recommended protocol.

### 369 **Statistical Analysis**

370 All data are presented as the mean $\pm$  s.d. from at least three independent  
371 experiments. Student's two-tailed *t*-test was used to compare the means of two-group  
372 samples. Two-way analysis of variance (ANOVA) was applied for the comparison of  
373 multiple groups in different H/R times. A one-way analysis of variance (ANOVA) was  
374 applied to determine the significant effect of 3-MA or rapamycin on studied rats  
375 pretreated with lung I/R followed by the least significant difference (equal variances  
376 assumed) or Tamhane's T2 (equal variances not assumed) tests. All statistical analyses

377 were performed using the *Graph Pad Prism5* software. *P* values less than 0.05 were  
378 considered significant. No statistical method was used to predetermine sample size.  
379 Randomization and a blinding strategy were used whenever possible.

#### 380 **Competing interests**

381 The authors declare no conflict of interest.

#### 382 **Acknowledgements**

383 We are grateful to the model organism collaborative innovation center of Wuhan  
384 University for its support with homologous male rats. We are grateful to the  
385 instruments of the school of life sciences at Wuhan University. This work was  
386 supported by award from the National Science Foundation of China Grants  
387 81770095(to Q.G.), 81170076(to Q.G.), and 81700093(to T.F.).

#### 388 **References**

- 389 1. **Liu S, Zhang J, Yu B, Huang L, Dai B, Liu J, Tang J.** 2016. The role of  
390 autophagy in lung ischemia/reperfusion injury after lung transplantation in  
391 rats. *American journal of translational research* **8**:3593-3602.
- 392 2. **Simmons LJ, Surles-Zeigler MC, Li Y, Ford GD, Newman GD, Ford BD.**  
393 2016. Regulation of inflammatory responses by neuregulin-1 in brain ischemia  
394 and microglial cells in vitro involves the NF-kappa B pathway. *Journal of*  
395 *neuroinflammation* **13**:237.
- 396 3. **Fan T, Huang Z, Chen L, Wang W, Zhang B, Xu Y, Pan S, Mao Z, Hu H,**  
397 **Geng Q.** 2016. Associations between autophagy, the ubiquitin-proteasome  
398 system and endoplasmic reticulum stress in hypoxia-deoxygenation or

- 399 ischemia-reperfusion. *European journal of pharmacology* **791**:157-167.
- 400 4. **Fisher AB, Al-Mehdi AB, Muzykantov V.** 1999. Activation of endothelial  
401 NADPH oxidase as the source of a reactive oxygen species in lung ischemia.  
402 *Chest* **116**:25s-26s.
- 403 5. **Kennedy TP, Rao NV, Hopkins C, Pennington L, Tolley E, Hoidal JR.**  
404 1989. Role of reactive oxygen species in reperfusion injury of the rabbit lung.  
405 *The Journal of clinical investigation* **83**:1326-1335.
- 406 6. **Ucar G, Topaloglu E, Kandilci HB, Gumusel B.** 2005. Effect of ischemic  
407 preconditioning on reactive oxygen species-mediated ischemia--reperfusion  
408 injury in the isolated perfused rat lung. *Clinical biochemistry* **38**:681-684.
- 409 7. **Hansen LW, Khader A, Yang WL, Prince JM, Nicastro JM, Coppa GF,**  
410 **Wang P.** 2016. SIRTUIN 1 ACTIVATOR SRT1720 PROTECTS AGAINST  
411 ORGAN INJURY INDUCED BY INTESTINAL  
412 ISCHEMIA-REPERFUSION. *Shock (Augusta, Ga.)* **45**:359-366.
- 413 8. **Zhang H, Wan Z, Yan X, Wang DG, Leng Y, Liu Y, Zhang Y, Zhang H,**  
414 **Han X.** 2016. Protective effect of Shenfu injection preconditioning on lung  
415 ischemia-reperfusion injury. *Experimental and therapeutic medicine*  
416 **12**:1663-1670.
- 417 9. **Zhao Q, Wu J, Hua Q, Lin Z, Ye L, Zhang W, Wu G, Du J, Xia J, Chu M,**  
418 **Hu X.** 2016. Resolvin D1 mitigates energy metabolism disorder after  
419 ischemia-reperfusion of the rat lung. *Journal of translational medicine* **14**:81.
- 420 10. **Hayden MS, Ghosh S.** 2008. Shared principles in NF-kappaB signaling. *Cell*

- 421           **132:344-362.**
- 422   11.   **Nurmi A, Lindsberg PJ, Koistinaho M, Zhang W, Juettler E,**  
423           **Karjalainen-Lindsberg ML, Weih F, Frank N, Schwaninger M,**  
424           **Koistinaho J.** 2004. Nuclear factor-kappaB contributes to infarction after  
425           permanent focal ischemia. *Stroke; a journal of cerebral circulation*  
426           **35:987-991.**
- 427   12.   **Zhan J, Qin W, Zhang Y, Jiang J, Ma H, Li Q, Luo Y.** 2016. Upregulation  
428           of neuronal zinc finger protein A20 expression is required for  
429           electroacupuncture to attenuate the cerebral inflammatory injury mediated by  
430           the nuclear factor-kB signaling pathway in cerebral ischemia/reperfusion rats.  
431           *Journal of neuroinflammation* **13:258.**
- 432   13.   **Tian XF, Yao JH, Zhang XS, Zheng SS, Guo XH, Wang LM, Wang ZZ,**  
433           **Liu KX.** 2010. Protective effect of carnosol on lung injury induced by  
434           intestinal ischemia/reperfusion. *Surgery today* **40:858-865.**
- 435   14.   **Fan Z, Yao J, Li Y, Hu X, Shao H, Tian X.** 2015. Anti-inflammatory and  
436           antioxidant effects of curcumin on acute lung injury in a rodent model of  
437           intestinal ischemia reperfusion by inhibiting the pathway of NF-Kb.  
438           *International journal of clinical and experimental pathology* **8:3451-3459.**
- 439   15.   **Tian XF, Zhang XS, Li YH, Wang ZZ, Zhang F, Wang LM, Yao JH.** 2006.  
440           Proteasome inhibition attenuates lung injury induced by intestinal ischemia  
441           reperfusion in rats. *Life sciences* **79:2069-2076.**
- 442   16.   **Tian XF, Yao JH, Li YH, Zhang XS, Feng BA, Yang CM, Zheng SS.** 2006.

- 443 Effect of nuclear factor kappa B on intercellular adhesion molecule-1  
444 expression and neutrophil infiltration in lung injury induced by intestinal  
445 ischemia/reperfusion in rats. *World journal of gastroenterology* **12**:388-392.
- 446 17. **Saraiva M, O'Garra A.** 2010. The regulation of IL-10 production by immune  
447 cells. *Nature reviews. Immunology* **10**:170-181.
- 448 18. **Shouval DS, Biswas A, Goettel JA, McCann K, Conaway E, Redhu NS,**  
449 **Mascanfroni ID, Al Adham Z, Lavoie S, Ibourk M, Nguyen DD, Samsom**  
450 **JN, Escher JC, Somech R, Weiss B, Beier R, Conklin LS, Ebens CL,**  
451 **Santos FG, Ferreira AR, Sherlock M, Bhan AK, Muller W, Mora JR,**  
452 **Quintana FJ, Klein C, Muise AM, Horwitz BH, Snapper SB.** 2014.  
453 Interleukin-10 receptor signaling in innate immune cells regulates mucosal  
454 immune tolerance and anti-inflammatory macrophage function. *Immunity*  
455 **40**:706-719.
- 456 19. **Ktistakis NT, Tooze SA.** 2016. Digesting the Expanding Mechanisms of  
457 Autophagy. *Trends in cell biology* **26**:624-635.
- 458 20. **Wu Y, Li Y, Zhang H, Huang Y, Zhao P, Tang Y, Qiu X, Ying Y, Li W, Ni**  
459 **S, Zhang M, Liu L, Xu Y, Zhuang Q, Luo Z, Benda C, Song H, Liu B, Lai**  
460 **L, Liu X, Tse HF, Bao X, Chan WY, Esteban MA, Qin B, Pei D.** 2015.  
461 Autophagy and mTORC1 regulate the stochastic phase of somatic cell  
462 reprogramming. *Nature cell biology* **17**:715-725.
- 463 21. **Ashkenazi A, Bento CF, Ricketts T, Vicinanza M, Siddiqi F, Pavel M,**  
464 **Squitieri F, Hardenberg MC, Imarisio S, Menzies FM, Rubinsztein DC.**

- 465 2017. Polyglutamine tracts regulate beclin 1-dependent autophagy. *Nature*  
466 **545**:108-111.
- 467 22. **Chen Z, Teo AE, McCarty N.** 2016. ROS-Induced CXCR4 Signaling  
468 Regulates Mantle Cell Lymphoma (MCL) Cell Survival and Drug Resistance  
469 in the Bone Marrow Microenvironment via Autophagy. *Clinical cancer*  
470 *research : an official journal of the American Association for Cancer Research*  
471 **22**:187-199.
- 472 23. **Kongara S, Karantza V.** 2012. The interplay between autophagy and ROS in  
473 tumorigenesis. *Frontiers in oncology* **2**:171.
- 474 24. **Mizushima N, Yoshimori T, Levine B.** 2010. Methods in mammalian  
475 autophagy research. *Cell* **140**:313-326.
- 476 25. **Chang PC, Wang TY, Chang YT, Chu CY, Lee CL, Hsu HW, Zhou TA,**  
477 **Wu Z, Kim RH, Desai SJ, Liu S, Kung HJ.** 2014. Autophagy pathway is  
478 required for IL-6 induced neuroendocrine differentiation and chemoresistance  
479 of prostate cancer LNCaP cells. *PloS one* **9**:e88556.
- 480 26. **Saitoh T, Fujita N, Jang MH, Uematsu S, Yang BG, Satoh T, Omori H,**  
481 **Noda T, Yamamoto N, Komatsu M, Tanaka K, Kawai T, Tsujimura T,**  
482 **Takeuchi O, Yoshimori T, Akira S.** 2008. Loss of the autophagy protein  
483 Atg16L1 enhances endotoxin-induced IL-1beta production. *Nature*  
484 **456**:264-268.
- 485 27. **Delk NA, Farach-Carson MC.** 2012. Interleukin-6: a bone marrow stromal  
486 cell paracrine signal that induces neuroendocrine differentiation and modulates

- 487 autophagy in bone metastatic PCa cells. *Autophagy* **8**:650-663.
- 488 28. **Suzuki HI, Kiyono K, Miyazono K.** 2010. Regulation of autophagy by  
489 transforming growth factor-beta (TGF-beta) signaling. *Autophagy* **6**:645-647.
- 490 29. **Kim K, Li Y, Jin G, Chong W, Liu B, Lu J, Lee K, Demoya M, Velmahos**  
491 **GC, Alam HB.** 2012. Effect of valproic acid on acute lung injury in a rodent  
492 model of intestinal ischemia reperfusion. *Resuscitation* **83**:243-248.
- 493 30. **Fan T, Chen L, Huang Z, Mao Z, Wang W, Zhang B, Xu Y, Pan S, Hu H,**  
494 **Geng Q.** 2016. Autophagy decreases alveolar macrophage apoptosis by  
495 attenuating endoplasmic reticulum stress and oxidative stress. *Oncotarget*  
496 **7**:87206-87218.
- 497 31. **Wang J, Fa J, Wang P, Jia X, Peng H, Chen J, Wang Y, Wang C, Chen Q,**  
498 **Tu X, Wang QK, Xu C.** 2017. NINJ2- A novel regulator of endothelial  
499 inflammation and activation. *Cellular signalling* **35**:231-241.
- 500 32. **He M, Wang C, Sun JH, Liu Y, Wang H, Zhao JS, Li YF, Chang H, Hou**  
501 **JM, Song JN, Li AY, Ji ES.** 2017. Roscovitine attenuates intimal hyperplasia  
502 via inhibiting NF-kappaB and STAT3 activation induced by TNF-alpha in  
503 vascular smooth muscle cells. *Biochemical pharmacology* **137**:51-60.
- 504 33. **Yao JH, Zhang XS, Zheng SS, Li YH, Wang LM, Wang ZZ, Chu L, Hu**  
505 **XW, Liu KX, Tian XF.** 2009. Prophylaxis with carnosol attenuates liver  
506 injury induced by intestinal ischemia/reperfusion. *World journal of*  
507 *gastroenterology* **15**:3240-3245.
- 508 34. **Wu H, Chen G, Wyburn KR, Yin J, Bertolino P, Eris JM, Alexander SI,**

- 509           **Sharland AF, Chadban SJ.** 2007. TLR4 activation mediates kidney  
510 ischemia/reperfusion injury. *The Journal of clinical investigation*  
511 **117:2847-2859.**
- 512 35.   **Besson B, Sonthonnax F, Duchateau M.** 2017. Regulation of NF-kappaB by  
513 the p105-ABIN2-TPL2 complex and RelAp43 during rabies virus infection.  
514 **13:e1006697.**
- 515 36.   **Kulkarni U, Karsten CM, Kohler T, Hammerschmidt S, Bommert K,**  
516 **Tiburzy B, Meng L, Thieme L, Recke A, Ludwig RJ, Pollok K, Kalies K,**  
517 **Bogen B, Boettcher M, Kamradt T, Hauser AE, Langer C, Huber-Lang**  
518 **M, Finkelman FD, Kohl J, Wong DM, Manz RA.** 2016. IL-10 mediates  
519 plasmacytosis-associated immunodeficiency by inhibiting  
520 complement-mediated neutrophil migration. *The Journal of allergy and*  
521 *clinical immunology* **137:1487-1497.e1486.**
- 522 37.   **Ajuebor MN, Das AM, Virag L, Flower RJ, Szabo C, Perretti M.** 1999.  
523 Role of resident peritoneal macrophages and mast cells in chemokine  
524 production and neutrophil migration in acute inflammation: evidence for an  
525 inhibitory loop involving endogenous IL-10. *Journal of immunology*  
526 (Baltimore, Md. : 1950) **162:1685-1691.**
- 527 38.   **Adil MD, Kaiser P, Satti NK, Zargar AM, Vishwakarma RA, Tasduq SA.**  
528 2010. Effect of *Emblica officinalis* (fruit) against UVB-induced photo-aging in  
529 human skin fibroblasts. *Journal of ethnopharmacology* **132:109-114.**
- 530 39.   **Eng KE, Panas MD, Karlsson Hedestam GB, McInerney GM.** 2010. A



531 novel quantitative flow cytometry-based assay for autophagy. *Autophagy*

532 **6**:634-641.

533

534

535 **Figure legends**

536 **Fig. 1.** Effect of 3-MA and rapamycin on autophagy formation and  
537 GFP-LC3/CCL149 cell viability.

538 (A) Representative fluorescence microscopic images of GFP-LC3/CCL149 cells  
539 pretreated with 3-MA or rapamycin followed by H/R treatment for 0, 2, 4 and 6h.

540 Scale bars, 40 $\mu$ m.

541 (B) Quantitative results of the green cell surface area of LC3-GFP/CCL149 cells  
542 followed by H/R treatment for 0, 2, 4 and 6h in response to DMSO, 3-MA or  
543 rapamycin.

544 (C) Impact of 3-MA and rapamycin on LC3-GFP/CCL149 cell viability. The cells are  
545 treated with different concentrations of 3-MA (5, 10 and 15 $\mu$ mol/L) and rapamycin  
546 (150, 200 and 250 nmol/L) for 48h. The control cells are treated with an equal volume  
547 of DMSO. MTT assays are used to measure cell viability. The cell inhibition rate (%)  
548 is calculated by dividing control values. \* $p \geq 0.05$  compared to control at 0h; # $p < 0.05$   
549 compared to control at 2, 4 and 6h.

550 **Fig. 2.** Transmission electron microscope evaluating the effect of 3-MA and  
551 rapamycin on autophagosomes in alveolar epithelial cells treated with H/R. The cells  
552 are pretreated with 3-MA (5 $\mu$ mol/L) or rapamycin (250nmol/L) followed by H/R  
553 treatment for 0, 2, 4 and 6h. Scale bars, 500nm. The cell ultrastructure is observed  
554 under a transmission electron microscope. Arrowheads point to intracellular  
555 autophagy.

556 **Fig. 3.** Effect of 3-MA and rapamycin on expression of LC3-II/I and Beclin1 in

557 alveolar epithelial cells treated with H/R.

558 **(A)** Western blots showing the protein of LC3-II/I and Beclin1 in LC3-GFP/CCL149  
559 cells pretreated with DMSO, 3-MA and rapamycin followed by H/R treatment for 0, 2,  
560 4 and 6 h.

561 **(B, C)** The protein levels of GFP-LC3(b) and Beclin1(c) in LC3-GFP/CCL149 cells  
562 were quantified and analyzed in the indicated groups. \* $p \geq 0.05$  compared to control at  
563 0h; # $p < 0.05$  compared to control at 2, 4 and 6h.

564 **(D)** Flow cytometry was used to measure flux of endogenous LC3 protein. Pretreated  
565 with rapamycin exerted a higher level of EGFP-LC3-II-containing autophagosomes.

566 **Fig. 4.** Enhanced autophagy decreases H/R-induced expression of NF- $\kappa$ B in alveolar  
567 epithelial cells treated with H/R.

568 **(A)** Representative images of immunohistochemistry with anti-NF- $\kappa$ B antibody in  
569 LC3-GFP/CCL149 cells pretreated with DMSO, 3-MA and rapamycin followed by  
570 H/R treatment for 0, 2, 4 and 6h(n=5/group; scale bar, 30 $\mu$ m).

571 **(B)** Western blots showing the protein expression of NF- $\kappa$ B in the indicated groups.

572 **(C)** Immunohistochemistry analysis of the protein expressions of NF- $\kappa$ B in  
573 LC3-GFP/CCL149 cells in the indicated groups.

574 **(D)** The protein levels of NF- $\kappa$ B in LC3-GFP/CCL149 cells were quantified and  
575 analyzed. \* $p \geq 0.05$  compared to control at 0h; # $p < 0.05$  compared to control at 2,4 and  
576 6h.

577 **Fig. 5.** Enhanced autophagy increases anti-inflammatory factor expression of I $\kappa$ B in  
578 alveolar epithelial cells treated with H/R.

579 (A) Representative images of immunohistochemistry with anti-I $\kappa$ B antibody in  
580 LC3-GFP/CCL149 cells pretreated with DMSO, 3-MA and rapamycin followed by  
581 H/R treatment for 0, 2, 4 and 6h(n=5/group; scale bar, 30 $\mu$ m).

582 (B) Western blots showing the protein expression of I $\kappa$ B in the indicated groups.

583 (C) Immunohistochemistry analysis of the protein expression of I $\kappa$ B in  
584 LC3-GFP/CCL149 cells in the indicated groups.

585 (D) The protein levels of I $\kappa$ B in LC3-GFP/CCL149 cells were quantified and  
586 analyzed. \* $p \geq 0.05$  compared to control at 0h; # $p < 0.05$  compared to control at 2,4 and  
587 6h.

588 **Fig. 6.** Enhanced autophagy suppresses H/R-induced pro-inflammatory cytokine  
589 expression of TNF- $\alpha$ , IL-1 $\beta$ , MCP-1 and ICAM-1 and increases anti-inflammatory  
590 factor expression of IL-10 in alveolar epithelial cells treated with H/R.

591 (A, C, E, G, I) Determining the concentration of TNF- $\alpha$ , IL-1 $\beta$ , IL-10, MCP-1 and  
592 ICAM-1 protein concentration in each sample.

593 (B, D, F, H, J) ELISA measurement of serum TNF- $\alpha$ , IL-1 $\beta$ , IL-10, MCP-1 and  
594 ICAM-1 levels in LC3-GFP/CCL149 cells pretreated with DMSO, 3-MA and  
595 rapamycin followed by H/R treatment for 0, 2, 4 and 6h(n=5). The results are  
596 analyzed in the indicated groups. \* $p \geq 0.05$  compared to control at 0h; # $p < 0.05$   
597 compared to control at 2, 4 and 6h.

598 **Fig. 7.** Effect of 3-MA and rapamycin on autophagosome and expression of LC3 and  
599 Beclin1 in rat lungs treated with I/R.

600 (A) Transmission electron microscope image showing autophagosomes in lung tissues

601 from Lewis rats after the rats were lavaged with DMSO, 3-MA and rapamycin in lung  
602 ischemia for 2h and reperfusion for 2h. The model group was not treated with  
603 ischemia. Arrowheads point to autophagosomes.

604 **(B)** Western blots showing the protein levels of LC3 and Beclin 1 in lung tissues from  
605 Lewis rats after the rats were lavaged with DMSO, 3-MA and rapamycin in lung  
606 ischemia for 2h and reperfusion for 2h. The model group was not treated with  
607 ischemia.

608 **(C, D)** The protein levels of LC3 and Beclin 1 in Lewis rats were quantified and  
609 analyzed in the indicated groups. # $p < 0.05$  compared to control.

610 **Fig. 8.** Enhanced autophagy blocks the NF- $\kappa$ B signaling pathway by inhibiting NF- $\kappa$ B  
611 expression and increasing I $\kappa$ B expression in rat lungs treated with I/R.

612 **(A)** Representative images of immunohistochemical staining of a normal rat lung  
613 section (model group) and lung sections lavaged with DMSO (control group), 3-MA  
614 (3-MA group) and rapamycin (rapamycin) with an antibody against NF- $\kappa$ B or I $\kappa$ B;  
615 scale bar, 30 $\mu$ m.

616 **(B)** Immunohistochemistry analysis of the protein expression of NF- $\kappa$ B and I $\kappa$ B in rat  
617 lungs in the indicated groups.

618 **(C)** Western blots showing the protein levels of NF- $\kappa$ B and I $\kappa$ B in lung tissues from  
619 Lewis rats after the rats were lavaged with DMSO, 3-MA and rapamycin in lung  
620 ischemia for 2h and reperfusion for 2h. The model group was not treated with  
621 ischemia.

622 **(D, E)** The protein levels of NF- $\kappa$ B and I $\kappa$ B in Lewis rats were quantified and

623 analyzed in the indicated groups. # $p < 0.05$  compared to control.

624 **Fig. 9.** Enhanced autophagy suppresses H/R-induced pro-inflammatory cytokine  
625 expression of TNF- $\alpha$ , IL-1 $\beta$ , MCP-1 and ICAM-1 and increases anti-inflammatory  
626 factor expression of IL-10 in rat lungs treated with I/R.

627 **(A)** ELISA measurement of serum IL-1 $\beta$  and TNF- $\alpha$  levels in rat lungs of control,  
628 3-MA and rapamycin groups (n=5). The results are analyzed in the indicated groups.

629 **(B)** ELISA measurement of serum IL-10 level in rat lungs of control, 3-MA and  
630 rapamycin groups (n=5). The results are analyzed in the indicated groups.

631 **(C)** ELISA measurement of serum MCP-1 levels in rat lungs of control, 3-MA and  
632 rapamycin groups (n=5). The results are analyzed in the indicated groups.

633 **(D)** ELISA measurement of serum ICAM-1 levels in rat lungs of control, 3-MA and  
634 rapamycin groups (n=5). The results are analyzed in the indicated groups. # $p < 0.05$   
635 compared to control.

636

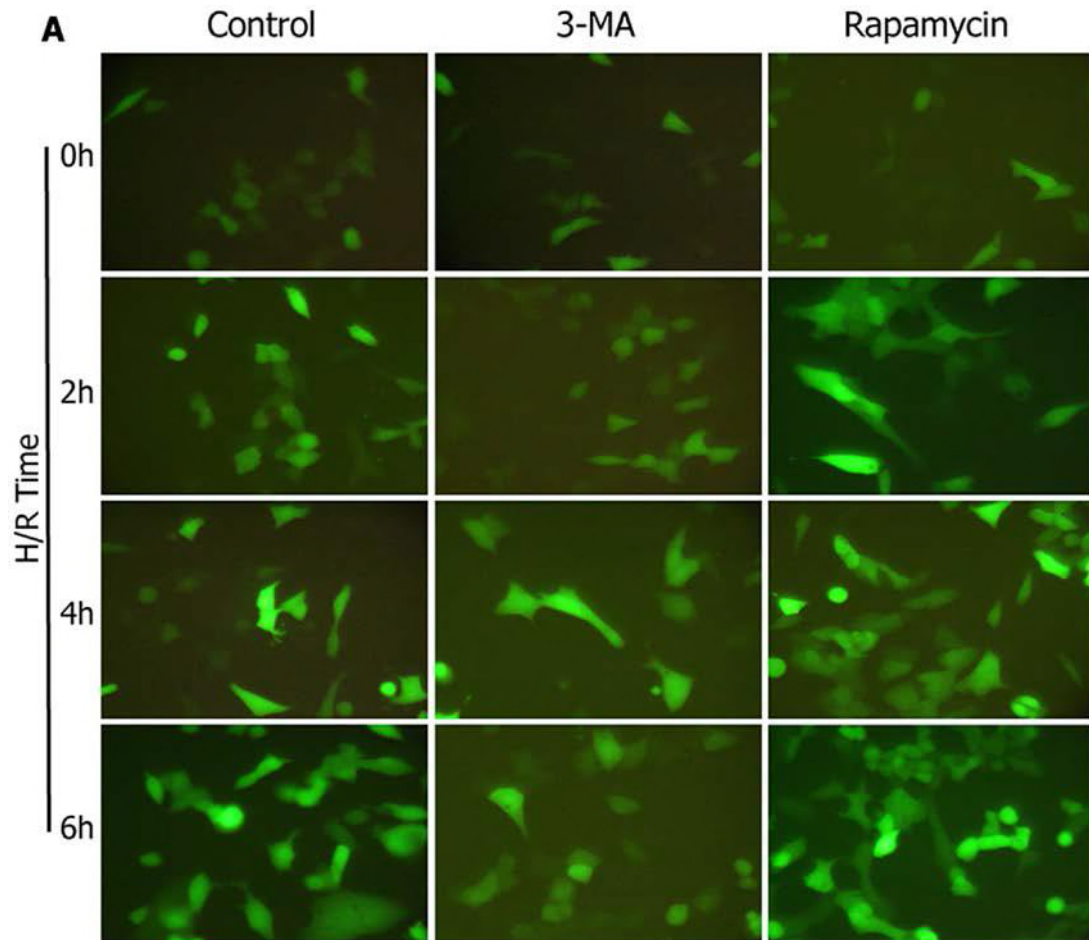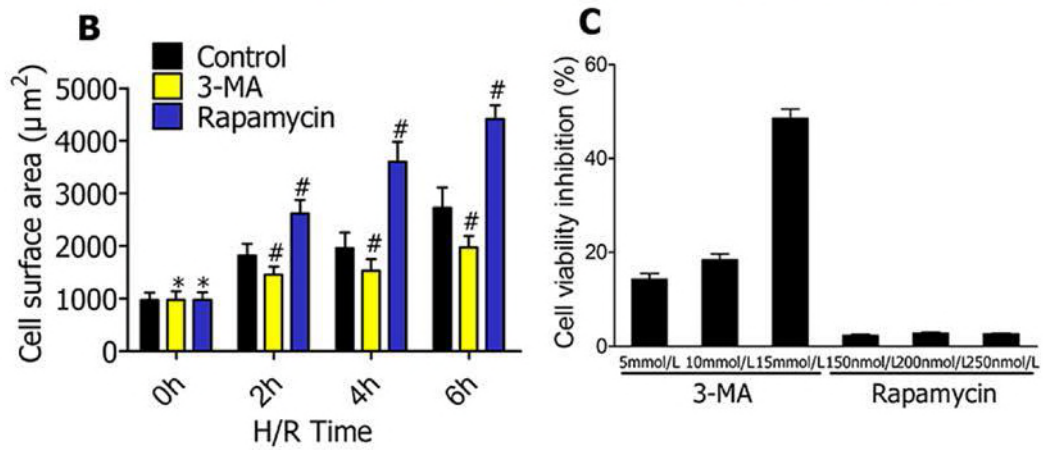



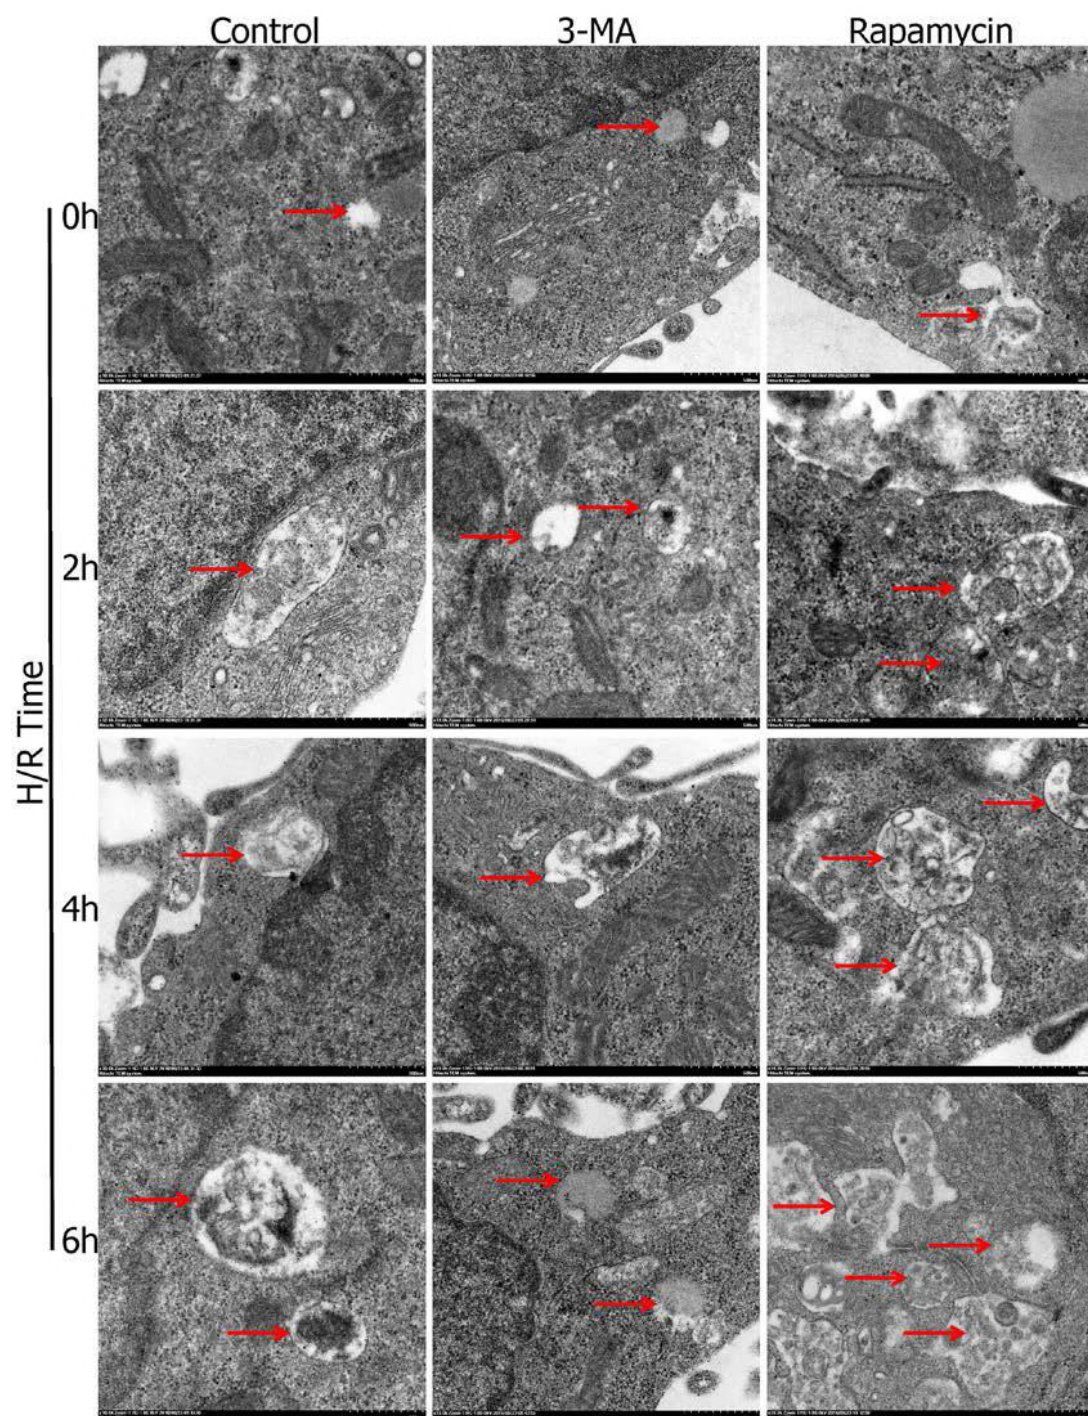



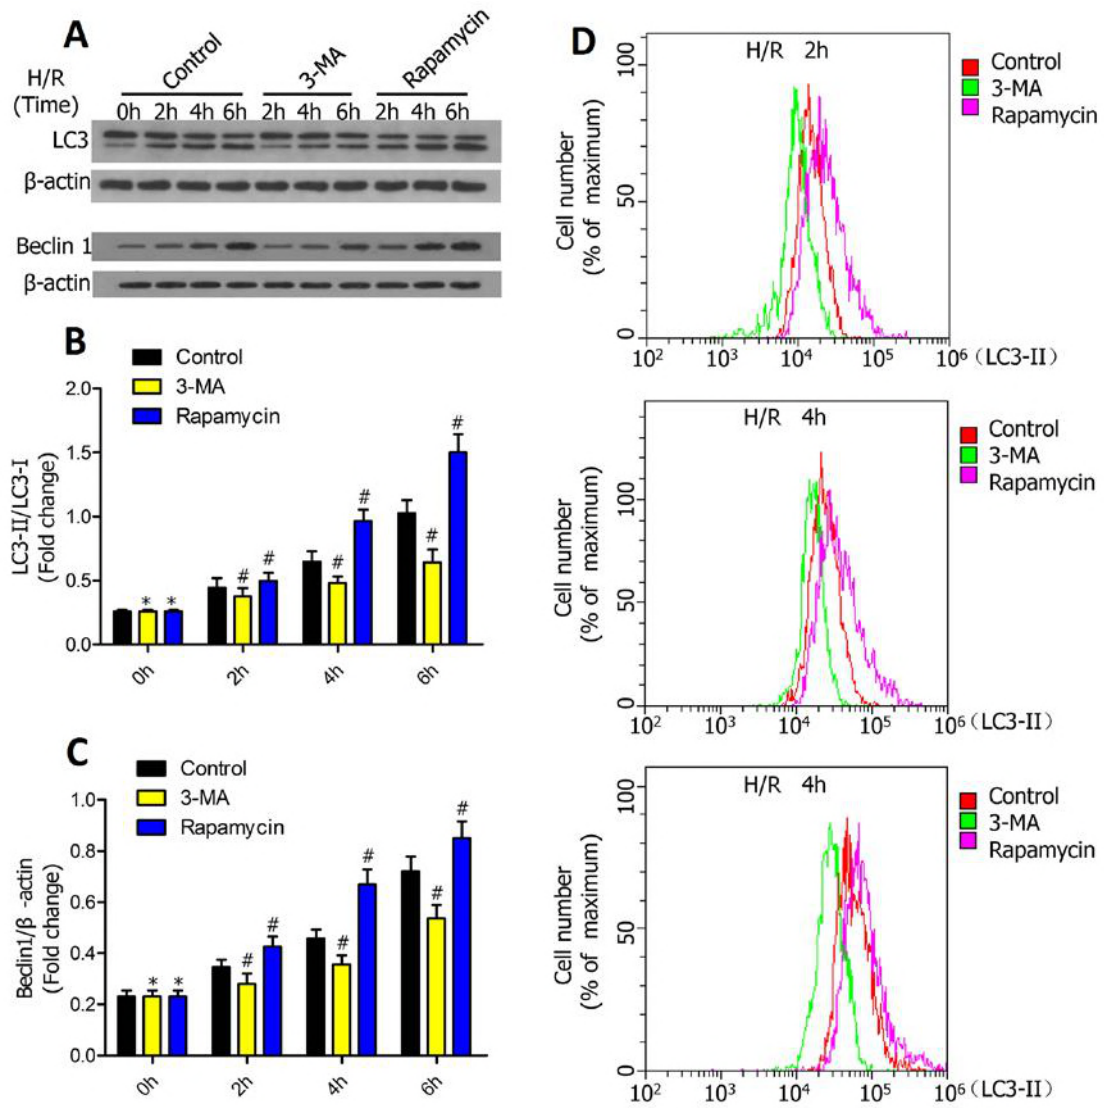

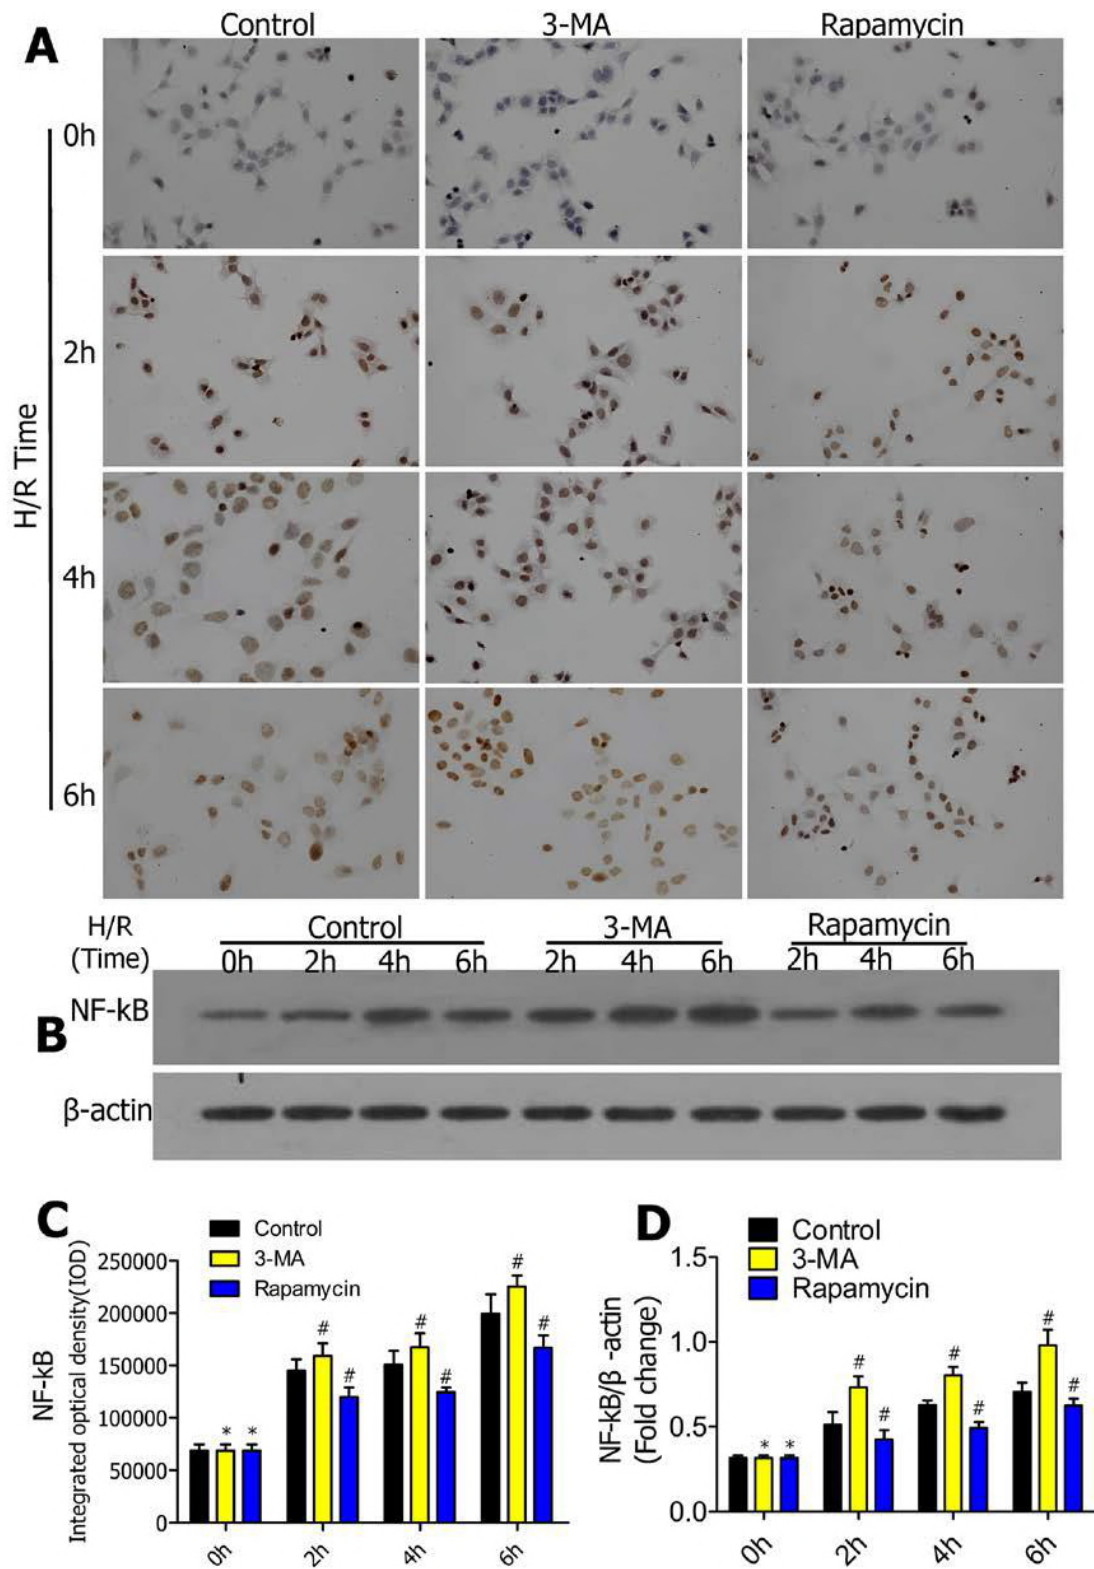

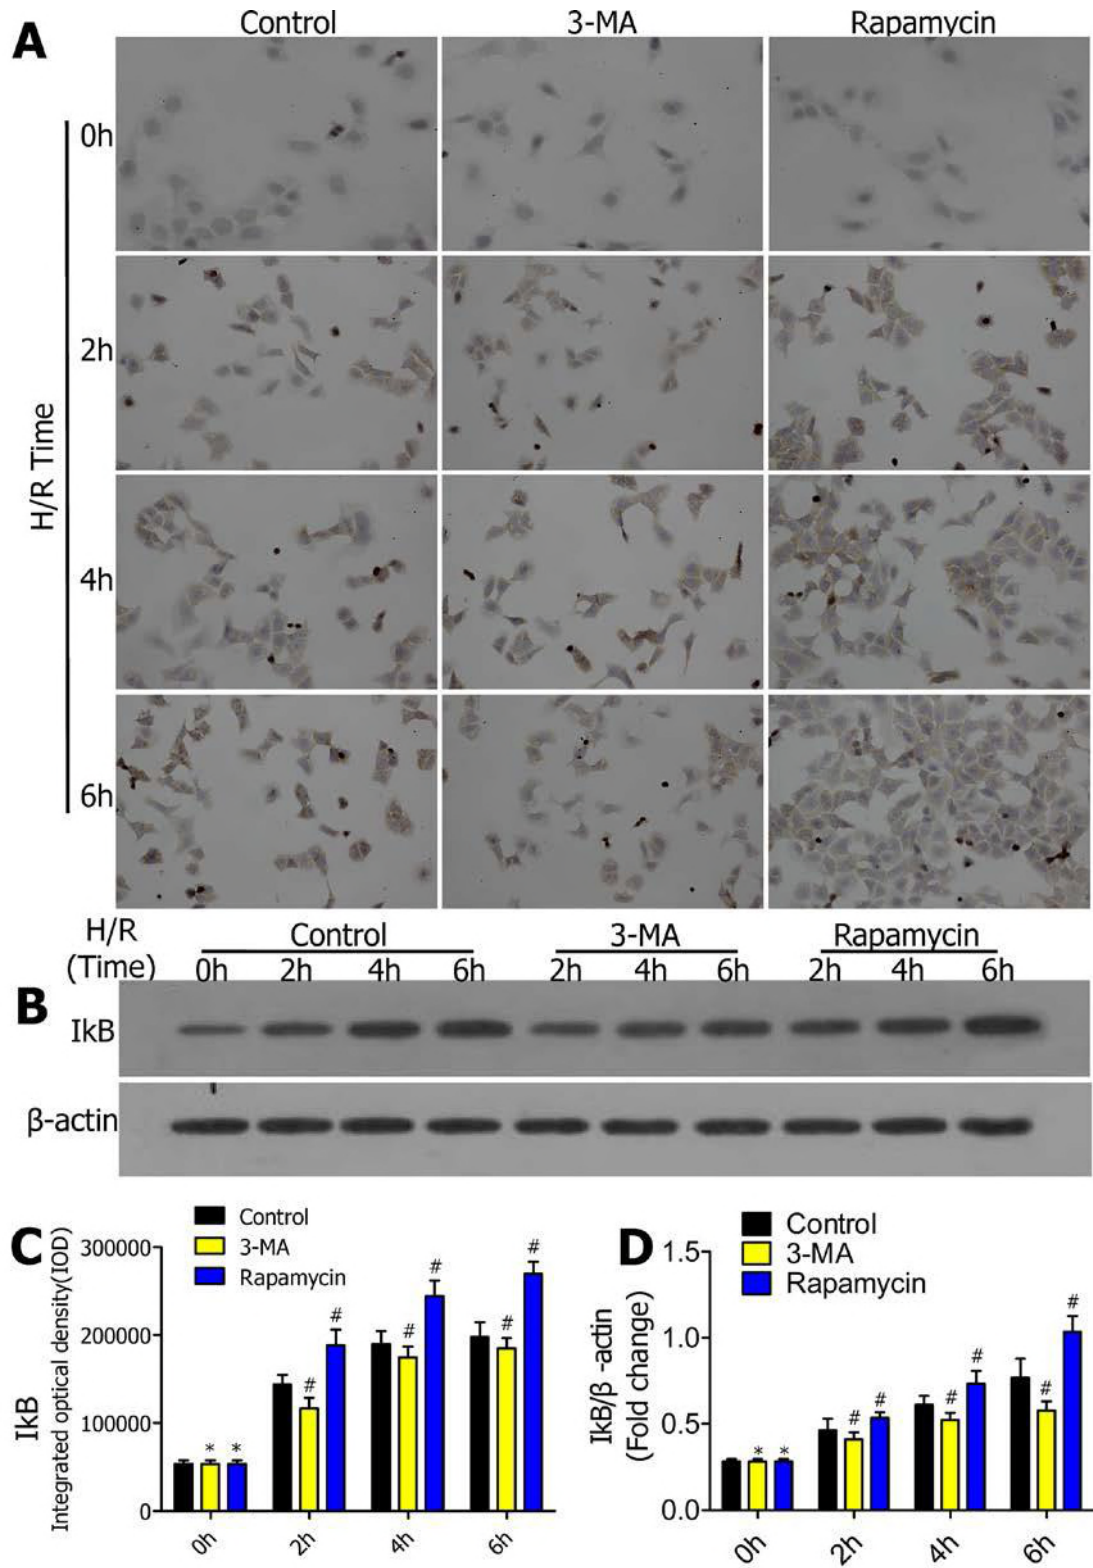

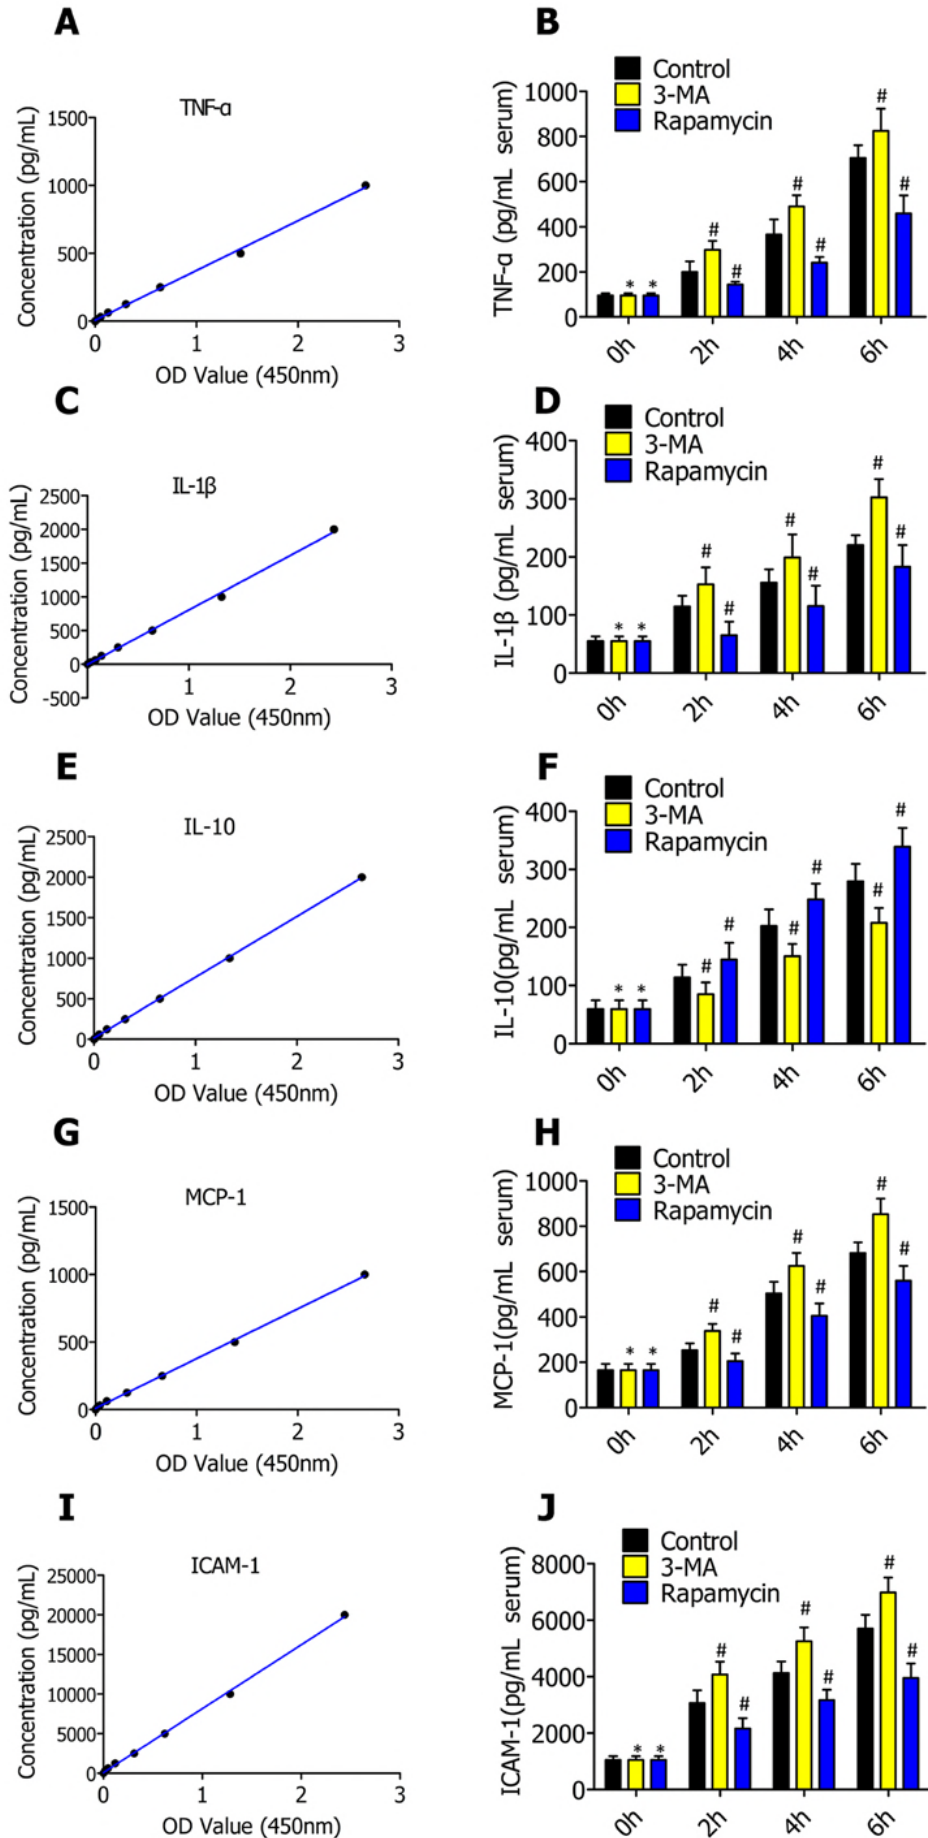



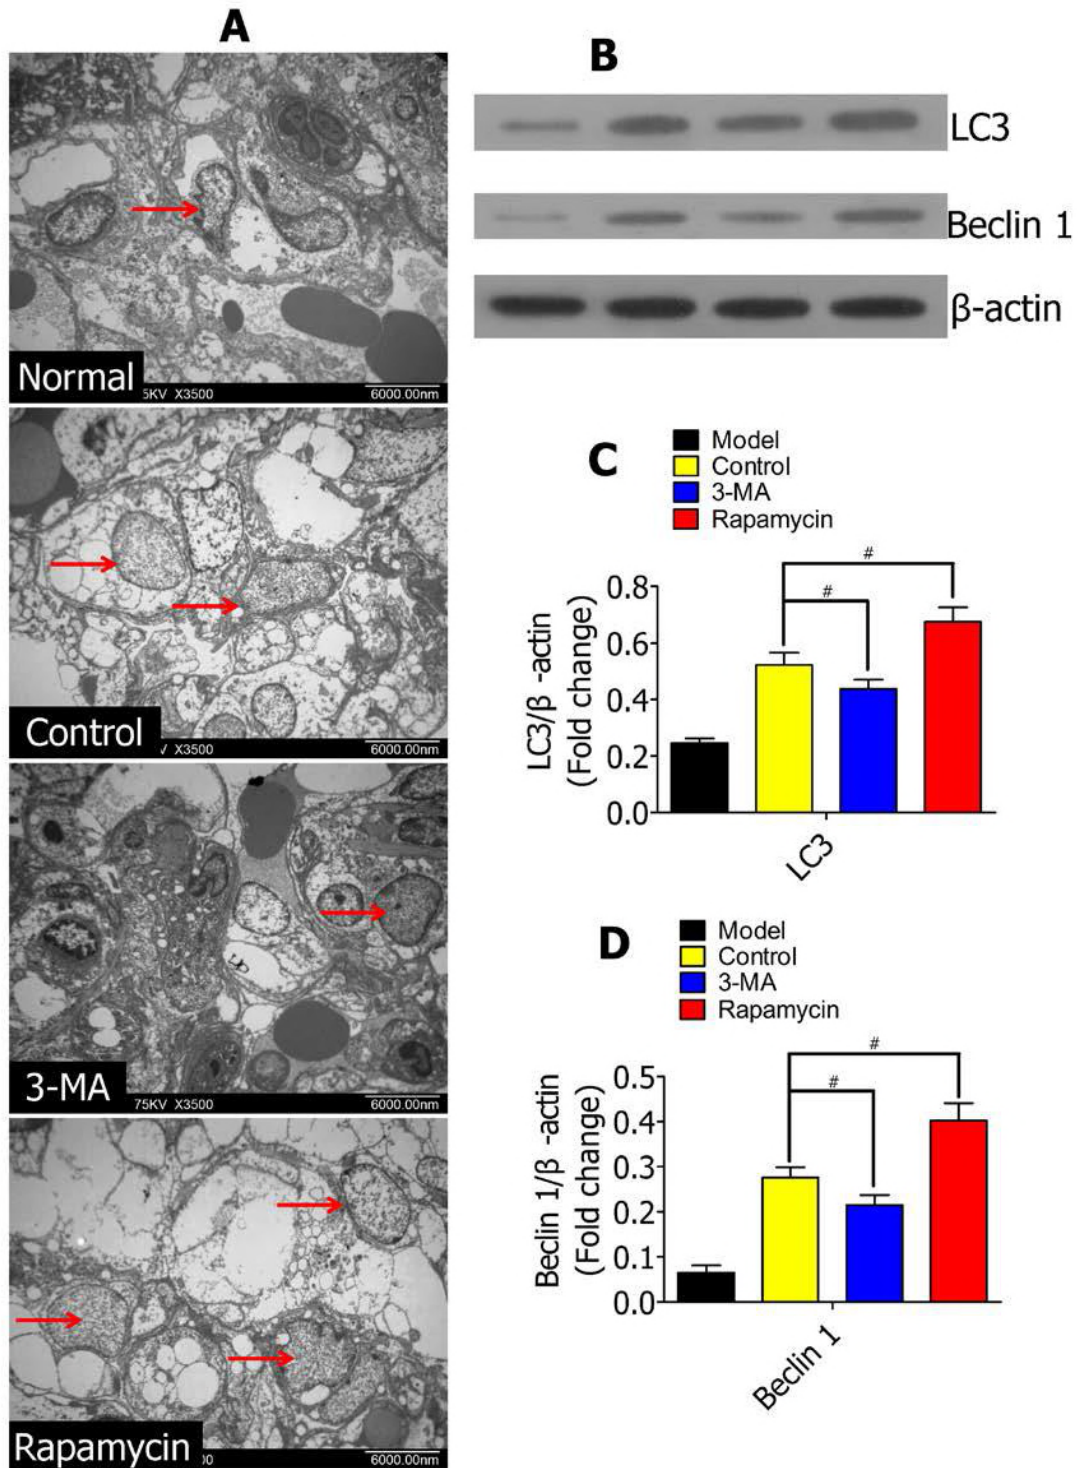

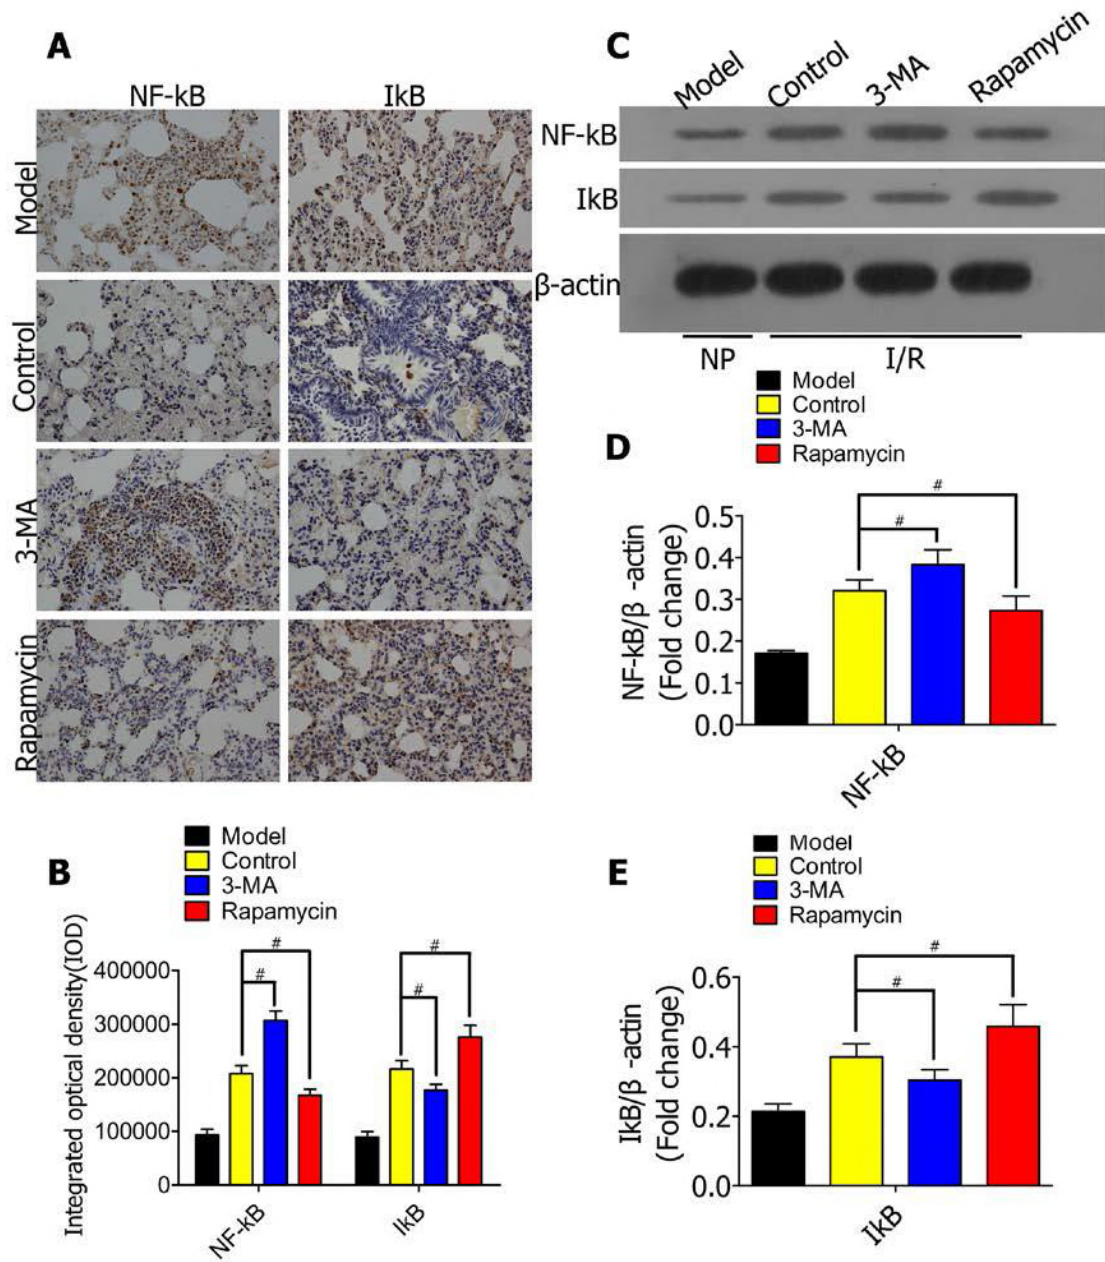

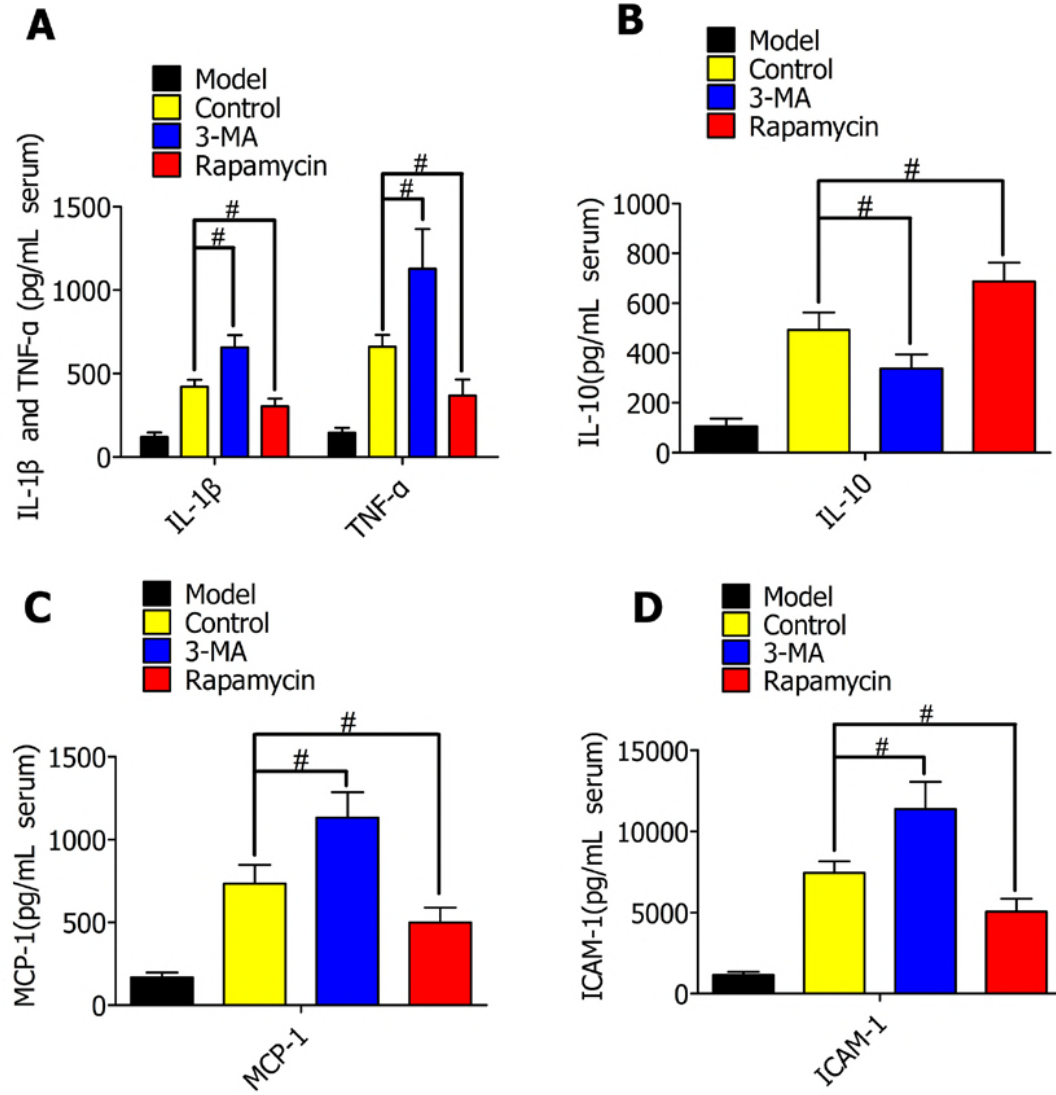

Source: https://www.biorxiv.org/content/early/2018/05/22/328039.full.pdf
